# Supplementary material for: Targeted inhibition of PTPN22 is a novel approach to alleviate osteogenic responses in aortic valve interstitial cells and aortic valve lesions in mice
Source: Springer Nature journal article supplement (doi:10.1186/s12916-023-02888-6), 2023-07-13

## Additional file 2

# Targeted inhibition of PTPN22 is a novel approach to alleviate osteogenic responses in aortic valve interstitial cells and aortic valve lesions in mice

Shunyi Li <sup>1,2</sup>, Zichao Luo <sup>1,2</sup>, Shuwen Su <sup>1,2</sup>, Liming Wen <sup>1,2</sup>, Gaopeng Xian <sup>1,2</sup>, Jing Zhao <sup>3</sup>, Xingbo Xu <sup>4</sup>, Dingli Xu <sup>1,2,\*</sup>, Qingchun Zeng <sup>1,2,\*</sup>

<sup>1</sup> State Key Laboratory of Organ Failure Research, Department of Cardiology, Nanfang Hospital, Southern Medical University, Guangzhou, 510515, China

<sup>2</sup> Guangdong Provincial Key Laboratory of Cardiac Function and Microcirculation, Southern Medical University, Guangzhou, 510515, China

<sup>3</sup> State Key Laboratory of Quality Research in Chinese Medicine, Institute of Chinese Medical Sciences, University of Macau, Macau, China

<sup>4</sup> Department of Cardiology and Pneumology, University Medical Center of Göttingen, Georg-August-University, Göttingen, Germany

\*Corresponding authors. E-mail: dinglixu@smu.edu.cn (D.X. ); qingchunzeng@smu.edu.cn (Q.Z.)

Figure 1

**E**

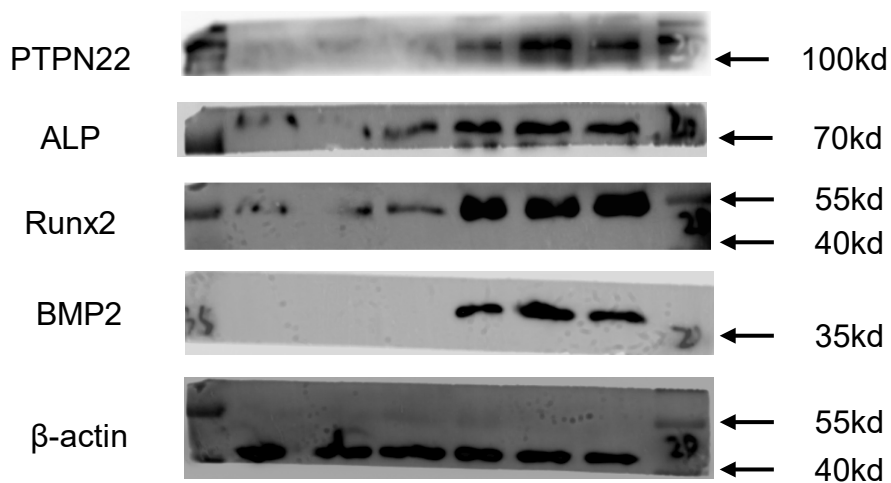

**G**

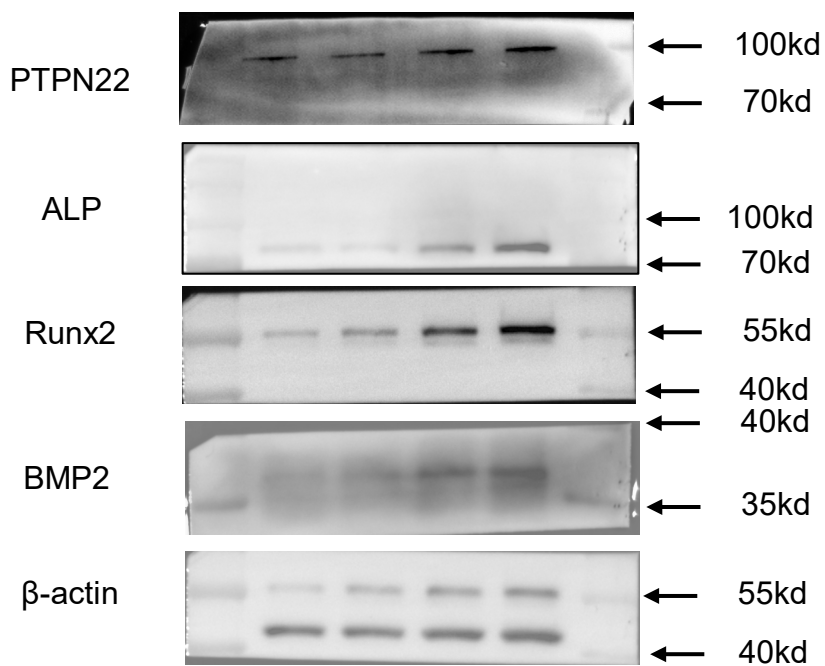

Figure 2

**A**

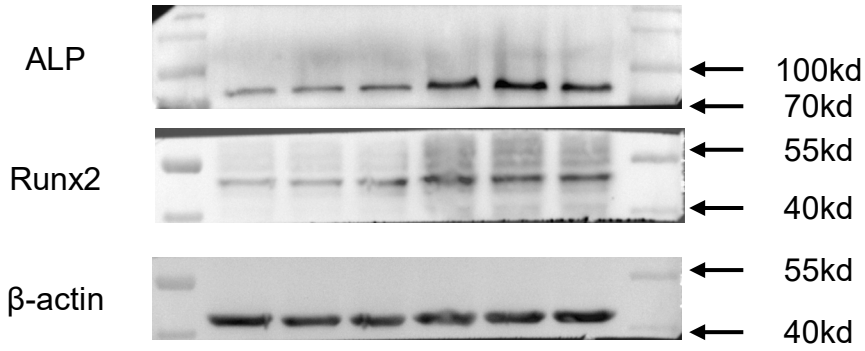

**C**

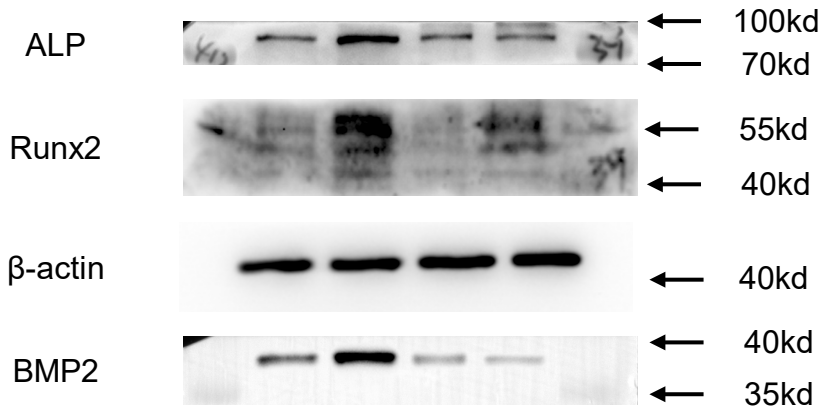

**I**

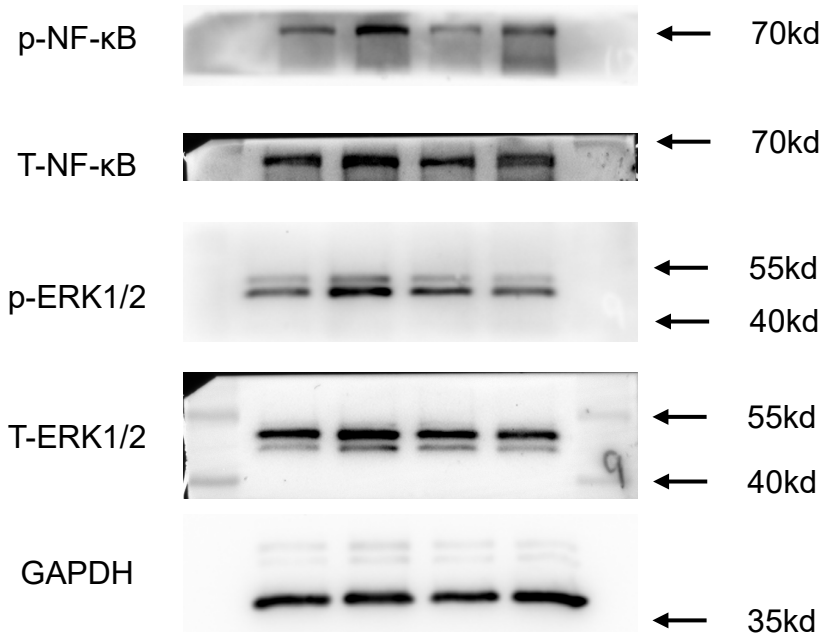

Figure 5

**A**

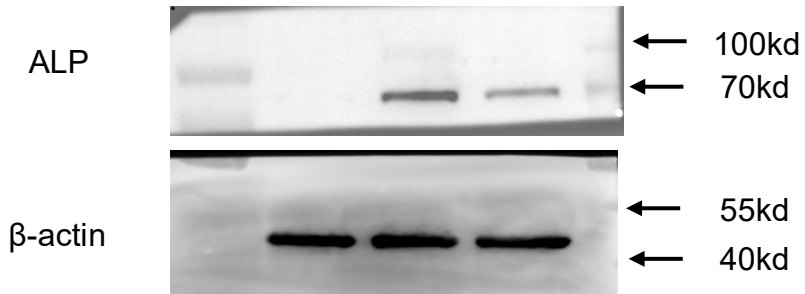

**B**

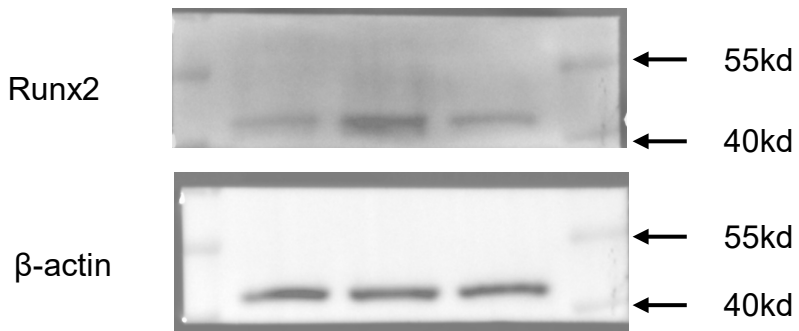

**C**

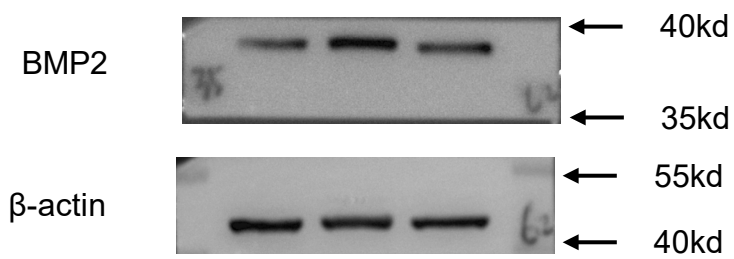

Figure 6

**A**

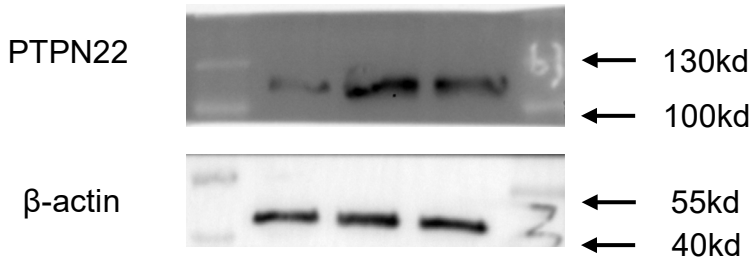

**D**

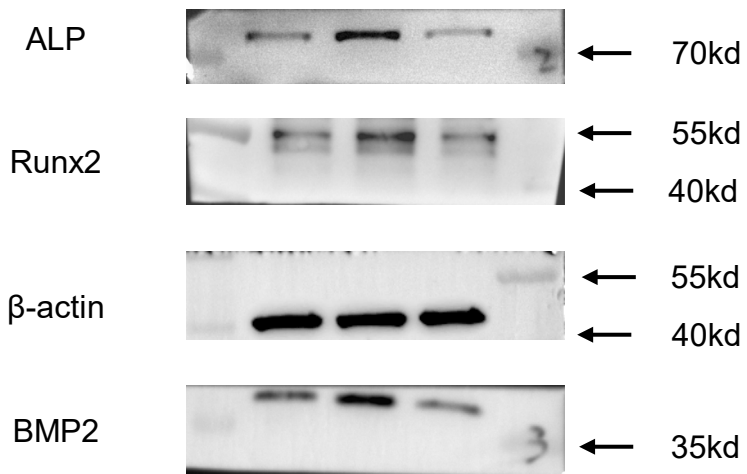

**F**

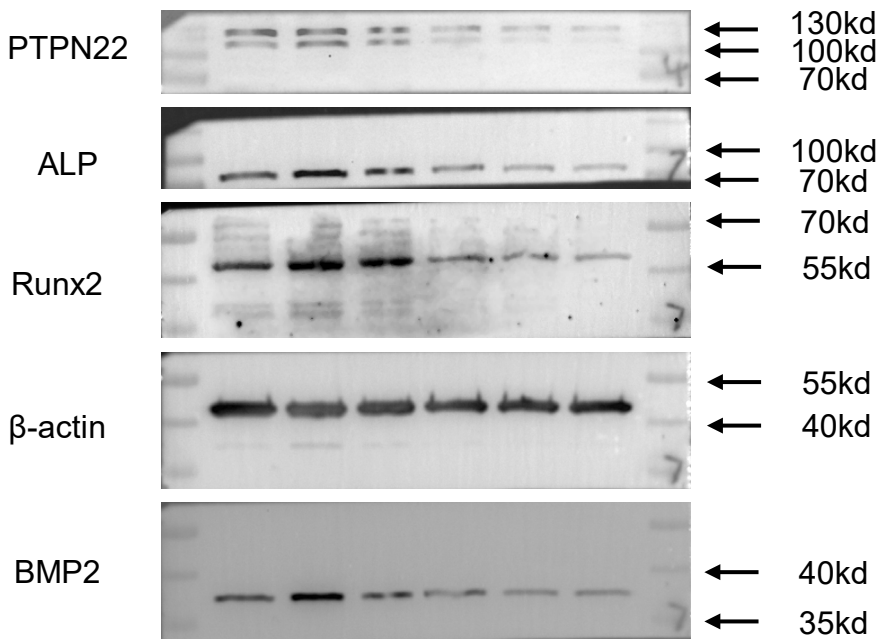

Figure 6

**H**

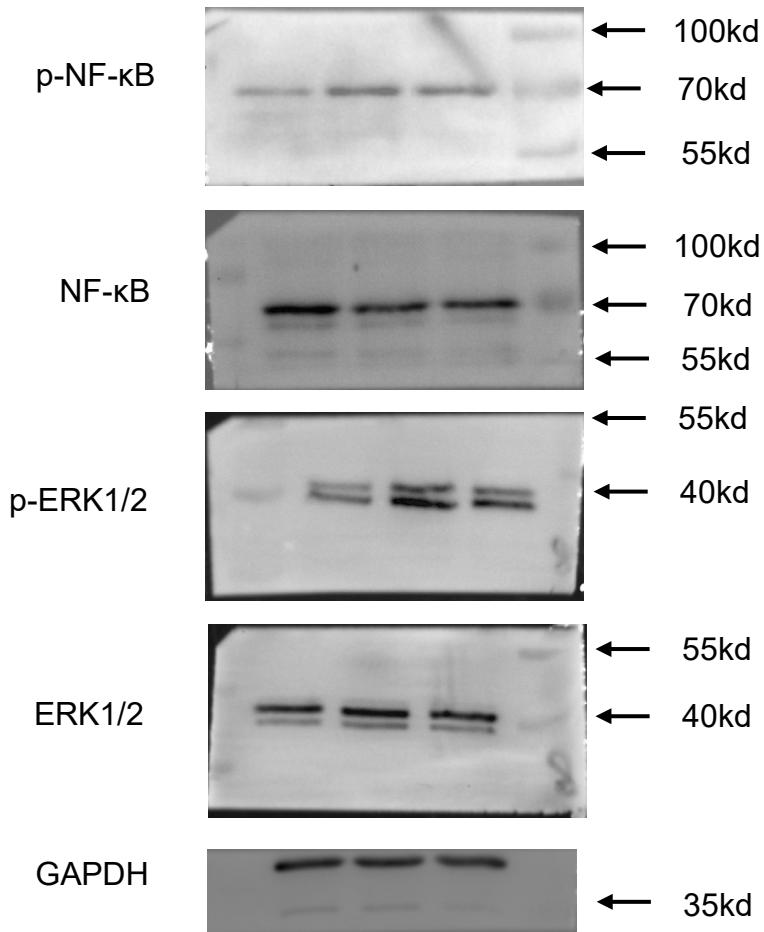

Supplement: MOESM2 [file 25767576]
